# Supplementary material
Source: PubMed Central journal article supplement (PMC4004181)
Supplement: NIHMS571979-supplement-Supplemental_Figure.pdf [file NIHMS571979-supplement-Supplemental_Figure.pdf]

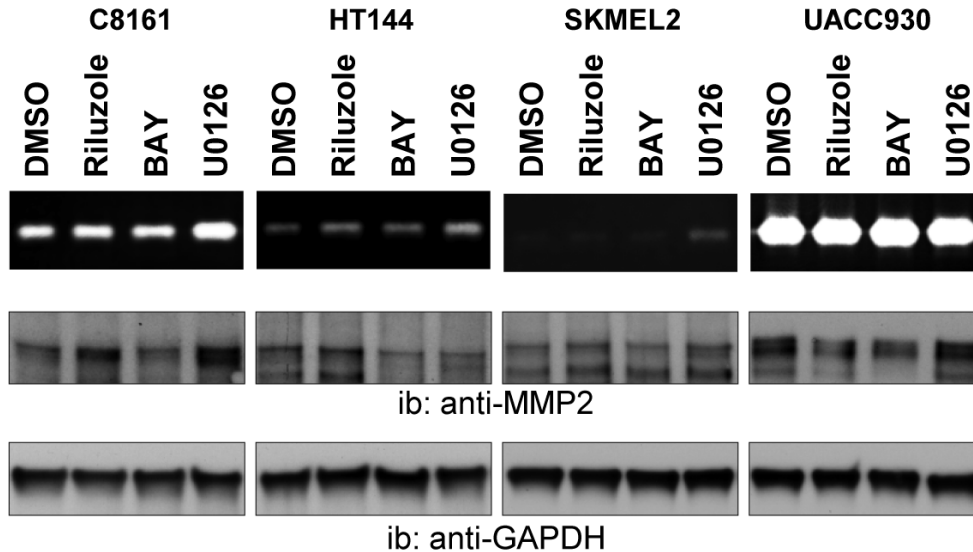

**Figure S1. MMP2 Activity unaffected by Riluzole or Bay 36-7620.**  $5 \times 10^5$  cells were plated into 4 parallel wells in a 6 well plate and allowed to recover O/N. They were then treated with the indicated inhibitors in serum free RPMI 16-40 media for 6 hrs, then replaced with fresh serum free media containing the inhibitors and returned to the incubator for an additional 12 hrs. Media was then collected and protein lysates prepared as indicated in the materials and methods. Protein concentrations were calculated via a standard Bradford assay and total protein levels were used to determine the amount of conditioned media used in gelatin zymography (upper panels).  $10 \mu\text{g}$  of total cell lysate was resolved by SDS-PAGE transferred to PVDF membranes and subsequently probed with anti-MMP2 (middle panels) or anti-GAPDH (lower panels) and their corresponding secondary antibodies. Chemiluminescent detection was performed via ECL-plus or ECL-Advance and exposure to X-ray film.
